# Supplementary material
Source: publisher figshare collection journal article supplement (https://acs.figshare.com/ndownloader/files/6685032)
Supplement: Supplementary file 1 [file 6685032]

# Supporting Information

## C-C Cleaving by Au/TiO<sub>2</sub> during Ethanol Oxidation: Understanding Bandgap Photo-Excitation and Plasmon Mediated Charge Transfer via Quantitative In-Situ DRIFTS

*Tze Hao Tan<sup>1</sup>, Jason Scott<sup>\*1</sup>, Yun Hau Ng<sup>1</sup>, Robert A. Taylor<sup>2</sup>, Kondo-Francois Aguey-Zinsou<sup>1</sup>, Rose  
Amal<sup>\*1</sup>.*

1. School of Chemical Engineering, The University of New South Wales (UNSW), Kensington, New  
South Wales 2052, Australia
2. School of Mechanical and Manufacturing Engineering, The University of New South Wales  
(UNSW), Kensington, New South Wales 2052, Australia

Email: [jason.scott@unsw.edu.au](mailto:jason.scott@unsw.edu.au), [r.amal@unsw.edu.au](mailto:r.amal@unsw.edu.au)

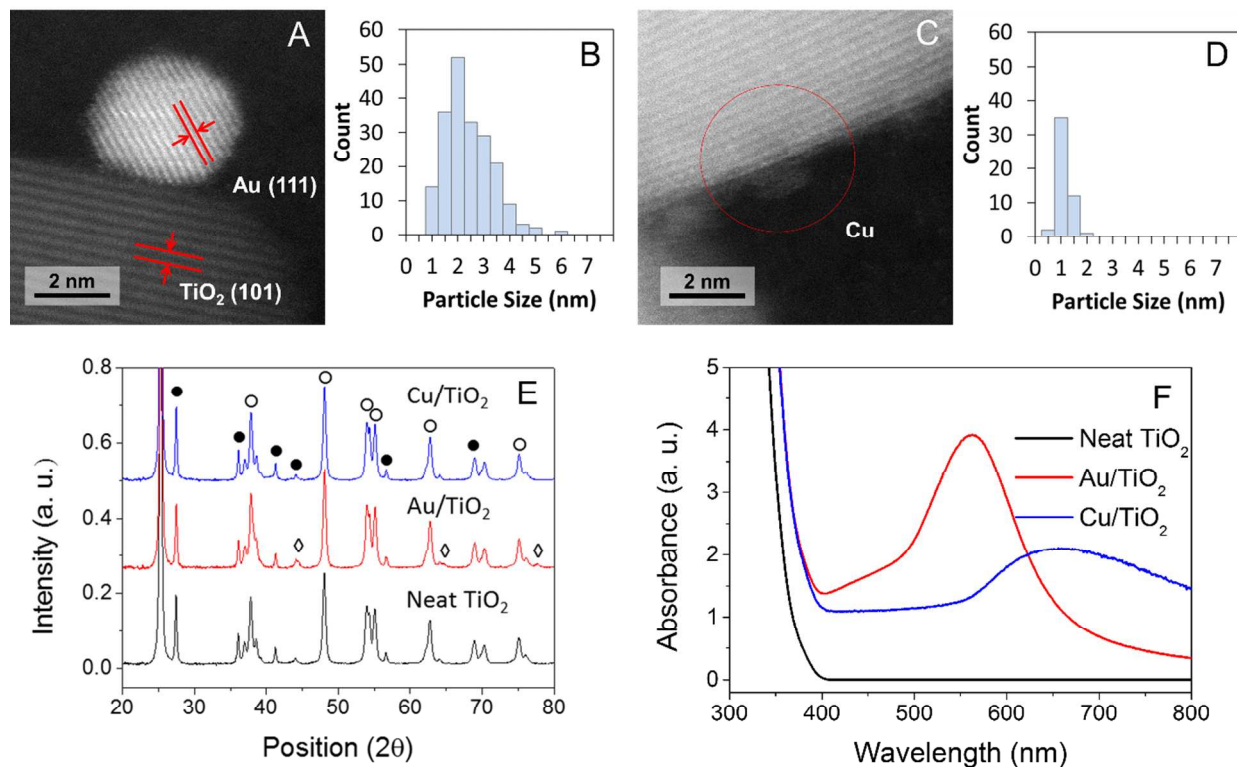

Figure S1 HAADF-STEM images and corresponding particle size distributions of Au/TiO<sub>2</sub> (A, B) and Cu/TiO<sub>2</sub> (C, D); XRD spectra of Cu/TiO<sub>2</sub>, Au/TiO<sub>2</sub> and neat TiO<sub>2</sub> identifying peaks corresponding to the planes of Au (marked by ♦) in addition to distinct TiO<sub>2</sub> peaks (marked by, ● (rutile) and ○ (anatase) (E); Diffuse reflectance UV-vis spectra of Cu/TiO<sub>2</sub>, Au/TiO<sub>2</sub> and neat TiO<sub>2</sub> showing a distinctive LSPR peak corresponding to Au (550 nm) and Cu (660 nm) (F). Adapted from Tan et al.<sup>1</sup> Copyright 2016 American Chemical Society.

Cu/TiO<sub>2</sub> was synthesised using the same DP method as for Au/TiO<sub>2</sub>. The deposited Cu metal had an average size of ~1 nm based on the HAADF-HRSTEM images. The observed Cu deposit sizes were consistent with the lack of Cu peaks in the Cu/TiO<sub>2</sub> XRD spectra (i.e. the Cu deposit size is too small to be observed), which only showed the distinctive peaks of rutile and anatase TiO<sub>2</sub>. Nonetheless, the LSPR peak of Cu at 660 nm indicates that the synthesised Cu deposits were present as metallic Cu.

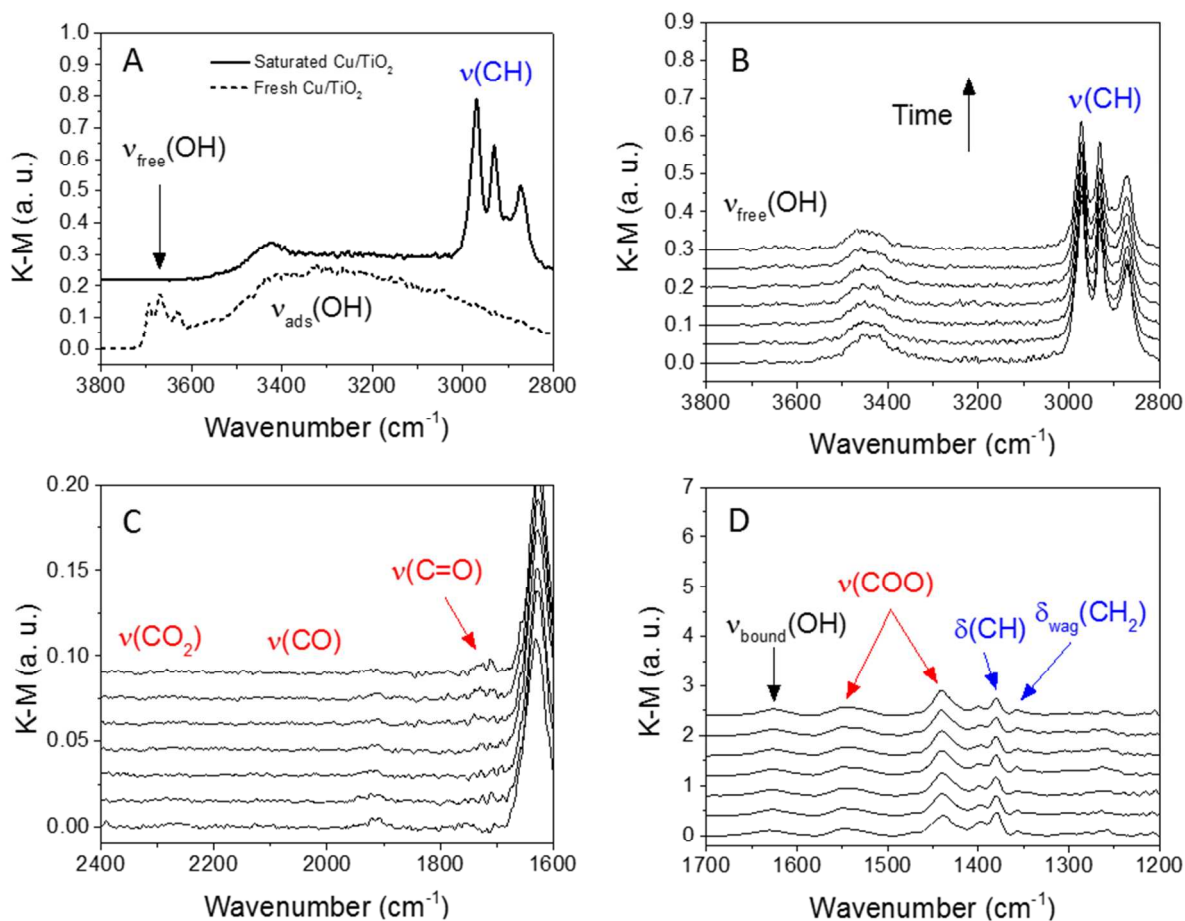

Figure S2 (A) In-situ DRIFTS spectra spanning (3800 – 3600 cm<sup>-1</sup>) of Cu/TiO<sub>2</sub> before and after ethanol adsorption at 50 °C for 20 min. Ethanol feed concentration = 1000 ppm ethanol in N<sub>2</sub>, gas flow rate = 20 mL/min, reaction performed at ambient pressure. In-situ DRIFTS spectra spanning: (B) 3800 – 3600 cm<sup>-1</sup>; (C) 2400 – 1600 cm<sup>-1</sup>; and (D) 1700 – 1200 cm<sup>-1</sup> wavenumbers in ascending time steps (0 - 90 min, 15 min intervals) for Cu/TiO<sub>2</sub> during ethanol oxidation in air at 100 °C without illumination (i.e. in the dark). Air flow rate = 20 mL/min, reaction performed at ambient pressure.

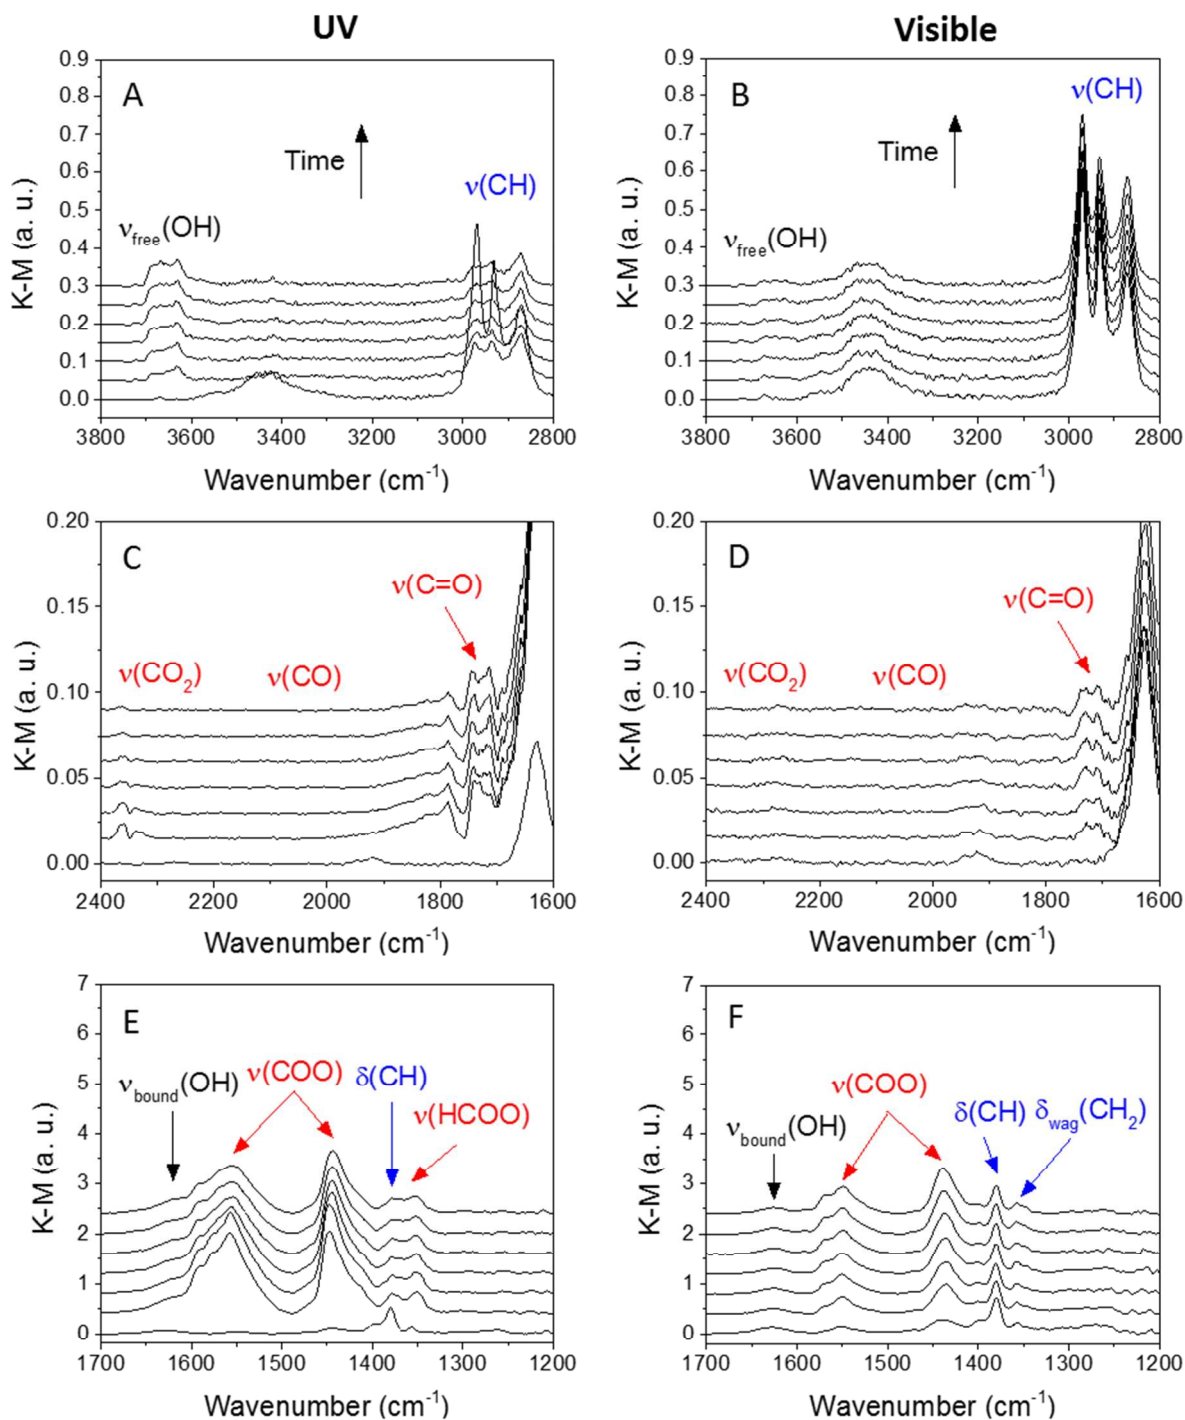

Figure S3 In-situ DRIFTS spectra spanning: (A, B) 3800 – 3600  $\text{cm}^{-1}$ ; (C, D) 2400 – 1600  $\text{cm}^{-1}$ ; and (E, F) 1700 – 1200  $\text{cm}^{-1}$  in ascending time steps (0 - 90 min, 15 min intervals) for Cu/TiO<sub>2</sub> (during ethanol oxidation in air at 100 °C under UV (365 nm, 20 W/cm<sup>2</sup>) and visible light (530 nm, 20 W/cm<sup>2</sup>) illumination. Air flow rate = 20 mL/min, reaction performed at ambient pressure.

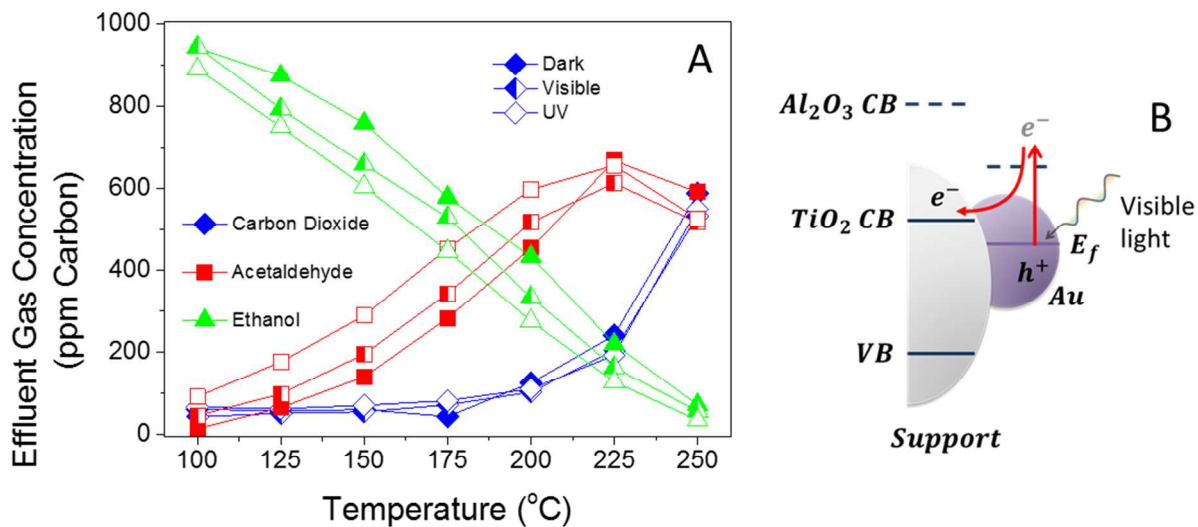

Figure S4 (A) Impact of temperature on the concentration of gases in the effluent stream during ethanol oxidation by Au/ $Al_2O_3$  under (i) dark, (ii) visible light, and (iii) UV illumination. Temperature programmed oxidation study was carried out as detailed in our previous work.<sup>1</sup> Initial ethanol concentration = 1000 ppm carbon in air, gas flow rate = 100 mL/min, reactions performed at ambient pressure. (B) Potential plasmon mediated charge transfer pathway from an Au deposit to the neighbouring support under visible light illumination.

## References

- (1) Tan, T. H.; Scott, J.; Ng, Y. H.; Taylor, R. A.; Aguey-Zinsou, K.-F.; Amal, R. *ACS Catal.* **2016**, *6*, 1870–1879.
